# Supplementary material for: Development of a PubMed Based Search Tool for Identifying Sex and Gender Specific Health Literature
Source: PubMed Central journal article supplement (PMC4761798; doi:10.1089/jwh.2015.5217), 2016-02-01
Supplement: Supp_Data.pdf [file Supp_Data.pdf]

SUPPLEMENTARY TABLE S1. REFERENCE ARTICLES FOR STROKE

| PMID     | Author                 | Title                                                                                                                                | Journal                   | Year | Month   | Vol. | Issue | Pages   |
|----------|------------------------|--------------------------------------------------------------------------------------------------------------------------------------|---------------------------|------|---------|------|-------|---------|
| 23032484 | Haast RA, et al.       | Sex differences in stroke                                                                                                            | J Cereb Blood Flow Metab  | 2012 | Dec     | 32   | 12    | 2100-7  |
| 22939800 | Caso V, et al.         | Antiplatelet treatment in primary and secondary stroke prevention in women                                                           | Eur J Intern Med          | 2012 | Oct     | 23   | 7     | 580-5   |
| 22569940 | Gall SL, et al.        | Sex differences in long-term outcomes after stroke: functional outcomes, handicap, and quality of life                               | Stroke                    | 2012 | Jul     | 43   | 7     | 1982-7  |
| 21797669 | Galbraith EM, et al.   | Women and heart disease: knowledge, worry, and motivation                                                                            | J Womens Health (Larchmt) | 2011 | Oct     | 20   | 10    | 1529-34 |
| 21905040 | Wenger NK              | What do the 2011 American Heart Association guidelines tell us about prevention of cardiovascular disease in women?                  | Clin Cardiol              | 2011 | Sep     | 34   | 9     | 520-3   |
| 22090661 | Dorresteijn JA, et al. | Aspirin for primary prevention of vascular events in women: individualized prediction of treatment effects                           | Eur Heart J               | 2011 | Dec     | 32   | 23    | 2962-9  |
| 21790339 | Meyer DM, et al.       | Sex differences in antiplatelet response in ischemic stroke                                                                          | Womens Health (Lond Engl) | 2011 | Jul     | 7    | 4     | 465-74  |
| 21612359 | Acciarresi M, et al.   | Secondary stroke prevention in women                                                                                                 | Womens Health (Lond Engl) | 2011 | May     | 7    | 3     | 391-7   |
| 21612358 | Reeves MJ, et al.      | Thrombolysis treatment for acute stroke: issues of efficacy and utilization in women                                                 | Womens Health (Lond Engl) | 2011 | May     | 7    | 3     | 383-90  |
| 21612354 | Adelman EE, et al.     | Gender differences in the primary prevention of stroke with aspirin                                                                  | Womens Health (Lond Engl) | 2011 | May     | 7    | 3     | 341-52  |
| 21602002 | Katsiki N, et al.      | Stroke, obesity and gender: a review of the literature                                                                               | Maturitas                 | 2011 | Jul     | 69   | 3     | 239-43  |
| 21205242 | Stroebele N, et al.    | Knowledge of risk factors and warning signs of stroke: a systematic review from a gender perspective                                 | Int J Stroke              | 2011 | Feb     | 6    | 1     | 60-6    |
| 21185736 | Kapral MK, et al.      | Gender differences in stroke care and outcomes in Ontario                                                                            | Womens Health Issues      | 2011 | Mar-Apr | 21   | 2     | 171-6   |
| 20698025 | Siegel C, et al.       | Sex differences in cerebral ischemia: possible molecular mechanisms                                                                  | J Neurosci Res            | 2010 | Oct     | 88   | 13    | 2765-74 |
| 20425178 | Persky RW, et al.      | Stroke in women: disparities and outcomes                                                                                            | Curr Cardiol Rep          | 2010 | Jan     | 12   | 1     | 6-13    |
| 20422793 | Beal CC                | Gender and stroke symptoms: a review of the current literature                                                                       | J Neurosci Nurs           | 2010 | Apr     | 42   | 2     | 80-7    |
| 20002005 | Appelros P, et al.     | A review on sex differences in stroke treatment and outcome                                                                          | Acta Neurol Scand         | 2010 | Jun     | 121  | 6     | 359-69  |
| 20194917 | Shobha N, et al.       | Differences in stroke outcome based on sex                                                                                           | Neurology                 | 2010 | Mar     | 74   | 9     | 767-71  |
| 19211484 | Petrea RE, et al.      | Gender differences in stroke incidence and poststroke disability in the Framingham heart study                                       | Stroke                    | 2009 | Apr     | 40   | 4     | 1032-7  |
| 19438018 | Berger JS, et al.      | Aspirin for the prevention of cardiovascular events in patients with peripheral artery disease: a meta-analysis of randomized trials | JAMA                      | 2009 | May     | 301  | 18    | 1909-19 |
| 19860135 | Vukovic V, et al.      | Women and stroke: how much do women and men differ? A review - diagnostics, clinical differences, therapy and outcome                | Coll Antropol             | 2009 | Sep     | 33   | 3     | 977-84  |
| 19531872 | Liu M, et al.          | Mechanisms of gender-linked ischemic brain injury                                                                                    | Restor Neurol Neurosci    | 2009 |         | 27   | 3     | 163-79  |

(continued)

SUPPLEMENTARY TABLE S1. (CONTINUED)

| <i>PMID</i> | <i>Author</i>       | <i>Title</i>                                                                                                                   | <i>Journal</i>                    | <i>Year</i> | <i>Month</i> | <i>Vol.</i> | <i>Issue</i> | <i>Pages</i> |
|-------------|---------------------|--------------------------------------------------------------------------------------------------------------------------------|-----------------------------------|-------------|--------------|-------------|--------------|--------------|
| 19452405    | Zuern CS, et al.    | Platelet function and response to aspirin: gender-specific features and implications for female thrombotic risk and management | Semin Thromb Hemost               | 2009        | Apr          | 35          | 3            | 295-306      |
| 19403054    | Sacco S, et al.     | Gender and stroke: acute phase treatment and prevention                                                                        | Funct Neurol                      | 2009        | Jan-Mar      | 24          | 1            | 45-52        |
| 19368068    | Carwile E, et al.   | Estrogen and stroke: a review of the current literature                                                                        | J Neurosci Nurs                   | 2009        | Feb          | 41          | 1            | 18-25        |
| 19228855    | Reeves M, et al.    | Sex differences in the use of intravenous rt-PA thrombolysis treatment for acute ischemic stroke: a meta-analysis              | Stroke                            | 2009        | May          | 40          | 5            | 1743-9       |
| 17947342    | Chen HF, et al.     | Sex differences in the incidence of hemorrhagic and ischemic stroke among diabetics in Taiwan                                  | J Womens Health (Larchmt)         | 2009        | May          | 18          | 5            | 647-54       |
| 19221205    | Bailey AL, et al.   | Thrombosis and antithrombotic therapy in women                                                                                 | Arterioscler Thromb Vasc Biol     | 2009        | Mar          | 29          | 3            | 284-8        |
| 19211488    | Appelros P, et al.  | Sex differences in stroke epidemiology: a systematic review                                                                    | Stroke                            | 2009        | Apr          | 40          | 4            | 1082-90      |
| 19118239    | Saposnik G, et al.  | Understanding stroke in women: similar care, worse outcomes?                                                                   | Stroke                            | 2009        | Mar          | 40          | 3            | 674-5        |
| 19996073    | Kapral MK, et al.   | Gender differences in carotid imaging and revascularization following stroke                                                   | Neurology                         | 2009        | Dec          | 73          | 23           | 1969-74      |
| 19228858    | Lisabeth LD, et al. | Acute stroke symptoms: comparing women and men                                                                                 | Stroke                            | 2009        | Jun          | 40          | 6            | 2031-6       |
| 19118246    | Eriksson M, et al.  | Sex differences in stroke care and outcome in the Swedish national quality register for stroke care                            | Stroke                            | 2009        | Mar          | 40          | 3            | 909-14       |
| 1839170     | Mazighi M, et al.   | Autopsy prevalence of intracranial atherosclerosis in patients with fatal stroke                                               | Stroke                            | 2008        | Apr          | 39          | 4            | 1142-7       |
| 18292386    | Reid JM, et al.     | Gender differences in stroke examined in a 10-year cohort of patients admitted to a Canadian teaching hospital                 | Stroke                            | 2008        | Apr          | 39          | 4            | 1090-95      |
| 17803222    | Wenger NK           | Preventing cardiovascular disease in women: an update                                                                          | Clin Cardiol                      | 2008        | Sep          | 31          | 3            | 109-113      |
| 18406504    | Kleinman JT, et al. | Gender differences in unilateral spatial neglect within 24 hours of stroke                                                     | Brain Cogn                        | 2008        | Oct          | 68          | 1            | 49-52        |
| 18048851    | Gargano JW, et al.  | Sex differences in acute stroke care in a statewide stroke registry                                                            | Stroke                            | 2008        | Jan          | 39          | 1            | 24-29        |
| 18199994    | Bushnell CD         | Stroke and the female brain                                                                                                    | Nature Clin Pract Neurol          | 2008        | Jan          | 4           | 1            | 22-33        |
| 18032738    | Touze E, et al.     | Sex differences in heritability of ischemic stroke: a systematic review and meta-analysis                                      | Stroke                            | 2008        | Jan          | 39          | 1            | 16-23        |
| 18451349    | Bushnell CD, et al. | Impact of comorbidities on ischemic stroke outcomes in women                                                                   | Stroke                            | 2008        | Jul          | 39          | 7            | 2138-40      |
| 18991796    | Saini M, et al.     | Stroke in women                                                                                                                | Recent Pat Cardiovasc Drug Discov | 2008        | Nov          | 3           | 3            | 209-21       |
| 18810232    | Turtzo LC, et al.   | Sex differences in stroke                                                                                                      | Cerebrovasc Dis                   | 2008        |              | 26          | 5            | 462-74       |
| 18722812    | Reeves MJ, et al.   | Sex differences in stroke: epidemiology, clinical presentation, medical care and outcomes                                      | Lancet Neurol                     | 2008        | Oct          | 7           | 10           | 915-26       |
| 18635489    | Vagnerova K, et al. | Gender and the injured brain                                                                                                   | Anesth Analg                      | 2008        | Jul          | 107         | 1            | 201-14       |

(continued)

SUPPLEMENTARY TABLE S1. (CONTINUED)

| PMID     | Author               | Title                                                                                                                                           | Journal                          | Year | Month   | Vol. | Issue   | Pages    |
|----------|----------------------|-------------------------------------------------------------------------------------------------------------------------------------------------|----------------------------------|------|---------|------|---------|----------|
| 17581944 | Towfighi A, et al.   | A midlife stroke surge among women in the United States                                                                                         | Neurology                        | 2007 | Nov     | 69   | 20      | 1898-904 |
| 17971641 | Egido JA, et al.     | Peculiarities of stroke risk in women                                                                                                           | Cerebrovasc Dis                  | 2007 | Jul     | 24   | Suppl 1 | 76-83    |
| 17519911 | Wenger NK            | The Reynolds Risk Score: improved accuracy for cardiovascular risk prediction in women?                                                         | Nature Clin Pract Cardiovasc Med | 2007 | Jul     | 4    | 7       | 366-67   |
| 17299196 | Ridker PM, et al.    | Development and validation of improved algorithms for the assessment of global cardiovascular risk in women: the Reynolds Risk Score            | JAMA                             | 2007 | Feb     | 297  | 6       | 611-9    |
| 17367675 | Mosca L, et al.      | Evidence-based guidelines for cardiovascular disease prevention in women: 2007 update                                                           | Circulation                      | 2007 | Mar     | 115  | 11      | 1481-501 |
| 17917527 | Mosaca L             | Guidelines for prevention of cardiovascular disease in women: a summary of recommendations                                                      | Prev Cardiol                     | 2007 | Fall    | 10   | Suppl 4 | 19-25    |
| 17885262 | Sander K, et al.     | High-sensitivity C-reactive protein is independently associated with early carotid artery progression in women but not in men: the INVADE Study | Stroke                           | 2007 | Nov     | 38   | 11      | 2881-86  |
| 17540969 | Williams JE, et al.  | Gender differences in outcomes among patients with symptomatic intracranial arterial stenosis                                                   | Stroke                           | 2007 | Jul     | 38   | 7       | 2055-62  |
| 17353472 | Elkind MS, et al.    | Sex as a predictor of outcomes in patients treated with thrombolysis for acute stroke                                                           | Neurology                        | 2007 | Mar     | 68   | 11      | 842-48   |
| 17673706 | Gargano JW, et al.   | Sex differences in stroke recovery and stroke-specific quality of life: results from a statewide stroke registry                                | Stroke                           | 2007 | Sep     | 38   | 9       | 2541-48  |
| 17901387 | Gray LJ, et al.      | Sex differences in quality of life in stroke survivors: data from the Tinzaparin in Atuce Ischemic Stroke Trial (TAIST)                         | Stroke                           | 2007 | Nov     | 38   | 11      | 2960-64  |
| 17310026 | Abbott RD, et al.    | Serum estradiol and risk of stroke in elderly men                                                                                               | Neurology                        | 2007 | Feb     | 68   | 8       | 563-68   |
| 17255545 | Sheikh K, et al.     | Effect of measurement on sex difference in stroke mortality                                                                                     | Stroke                           | 2007 | Mar     | 38   | 3       | 1085-87  |
| 17689390 | Barrett KM, et al.   | Sex differences in stroke severity, symptoms, and deficits after first-ever ischemic stroke                                                     | J Stroke Cerebrovasc Dis         | 2007 | Jan-Feb | 16   | 1       | 34-39    |
| 17525398 | Foerch C, et al.     | Sex disparity in the access of elderly patients to acute stroke and care                                                                        | Stroke                           | 2007 | Jul     | 38   | 7       | 2123-26  |
| 16397184 | Seshadri S, et al.   | The lifetime risk of stroke: estimates from the Framingham study                                                                                | Stroke                           | 2006 | Feb     | 37   | 2       | 345-50   |
| 16785347 | Goldstein LB, et al. | Primary prevention of ischemic stroke: a guideline from the American Heart Association/American Stroke Association Stroke Council               | Circulation                      | 2006 | Jun     | 113  | 24      | e873-923 |
| 16418466 | Berger JS, et al.    | Aspirin for the primary prevention of cardiovascular events in women and men: a sex-specific meta-analysis of randomized controlled trials      | JAMA                             | 2006 | Jan     | 295  | 3       | 306-13   |
| 16551714 | Becker DM, et al.    | Sex differences in platelet reactivity and response to low-dose aspirin therapy                                                                 | JAMA                             | 2006 | Mar     | 295  | 12      | 1420-27  |
| 16505591 | Fan AZ               | Metabolic syndrome and progression of atherosclerosis among middle-aged US adults                                                               | J Atheroscler Thromb             | 2006 | Feb     | 13   | 1       | 46-54    |

(continued)

SUPPLEMENTARY TABLE S1. (CONTINUED)

| PMID      | Author                | Title                                                                                                                                                                       | Journal                  | Year | Month   | Vol. | Issue | Pages    |
|-----------|-----------------------|-----------------------------------------------------------------------------------------------------------------------------------------------------------------------------|--------------------------|------|---------|------|-------|----------|
| 16820368  | Lip GY, et al.        | Anticoagulation for stroke prevention in atrial fibrillation: is gender important?                                                                                          | Eur Heart J              | 2006 | Aug     | 27   | 16    | 1893-4   |
| 17582368  | Lisbeth LD, et al.    | Barriers to intravenous tissue plasminogen activator for acute stroke therapy in women                                                                                      | Gender Med               | 2006 | Dec     | 3    | 4     | 270-8    |
| 16365615  | Kapral MK, et al.     | Gender differences in stroke care decision-making                                                                                                                           | Med Care                 | 2006 | Jan     | 44   | 1     | 70-80    |
| 16769954  | Shah SH, et al.       | Influence of gender on outcomes after intra-arterial thrombolysis for acute ischemic stroke                                                                                 | Neurology                | 2006 | Jun     | 66   | 11    | 1745-6   |
| 16888269  | Hill MD, et al.       | Sex-based differences in the effect of intra-arterial treatment of stroke: analysis of the PROACT-2 study                                                                   | Stroke                   | 2006 | Sep     | 37   | 9     | 2322-25  |
| 17082475  | Paolucci S, et al.    | Is sex a prognostic factor in stroke rehabilitation? A matched comparison                                                                                                   | Stroke                   | 2006 | Dec     | 37   | 12    | 2989-94  |
| 16728682  | Benatru I, et al.     | Stable stroke incidence rates but improved case-fatality in Dijon, France, from 1985 to 2004                                                                                | Stroke                   | 2006 |         | 37   |       | 1674-79  |
| 16702482  | Hendrix SL, et al.    | Effects of conjugated equine estrogen on stroke in the Women's Health Initiative                                                                                            | Circulation              | 2006 | May     | 113  | 20    | 2425-34  |
| 15735180  | Wexler DJ, et al.     | Sex disparities in treatment of cardiac risk factors in patients with type 2 diabetes                                                                                       | Diabetes                 | 2005 | Mar     | 28   | 3     | 514-20   |
| 15753114  | Ridker PM, et al.     | A randomized trial of low-dose aspirin in the primary prevention of cardiovascular disease in women                                                                         | N Engl J Med             | 2005 | Mar     | 352  | 13    | 1293-304 |
| 16157766  | Fang MC, et al.       | Gender differences in the risk of ischemic stroke and peripheral embolism in atrial fibrillation: the AnTicoagulation and Risk factors in Atrial fibrillation (ATRIA) study | Circulation              | 2005 | Sep     | 112  | 12    | 1687-91  |
| 15947268  | Savitz SI, et al.     | Arterial occlusive lesions recanalize more frequently in women than in men after intravenous tissue plasminogen activator administration for acute stroke                   | Stroke                   | 2005 | Jul     | 36   | 7     | 1447-51  |
| 15569865  | Kent DM, et al.       | Sex-based differences in response to recombinant tissue plasminogen activator in acute ischemic stroke: a pooled analysis of randomized clinical trials                     | Stroke                   | 2005 | Jan     | 36   | 1     | 62-65    |
| 174904029 | Anderson MN, et al.   | Sex differences in stroke survival: 10-year follow-up of the Copenhagen Stroke Study Cohort                                                                                 | J Stroke Cerebrovasc Dis | 2005 | Sep-Oct | 14   | 5     | 215-20   |
| 15637449  | Niewada M, et al.     | Influence of gender on baseline features and clinical outcomes among 17,370 patients with confirmed ischaemic stroke in the international stroke trial                      | Neuroepidemiology        | 2005 |         | 24   | 3     | 123-8    |
| 15689952  | McCullough LD, et al. | Ischemic nitric oxide and poly (ADP-ribose) polymerase-1 in cerebral ischemia: male toxicity, female protection                                                             | J Cereb Blood Flow Metab | 2005 | Apr     | 25   | 4     | 502-12   |
| 15963315  | Lai SM, et al.        | Sex differences in stroke recovery                                                                                                                                          | Prev Chronic Dis         | 2005 | Jul     | 2    | 3     | A13      |
| 15043958  | Rothwell PM, et al.   | Endarterectomy for symptomatic carotid stenosis in relation to clinical subgroups and timing of surgery                                                                     | Lancet Neurol            | 2004 | Mar     | 363  | 9413  | 915-24   |

(continued)

SUPPLEMENTARY TABLE S1. (CONTINUED)

| <i>PMID</i> | <i>Author</i>                 | <i>Title</i>                                                                                                                                                                                       | <i>Journal</i>  | <i>Year</i> | <i>Month</i> | <i>Vol.</i> | <i>Issue</i> | <i>Pages</i> |
|-------------|-------------------------------|----------------------------------------------------------------------------------------------------------------------------------------------------------------------------------------------------|-----------------|-------------|--------------|-------------|--------------|--------------|
| 15514193    | Rothwell PM, et al.           | Sex difference in the effect of time from symptoms to surgery on benefit from carotid endarterectomy for transient ischemic attack and nondisabling stroke                                         | Stroke          | 2004        | Dec          | 35          | 12           | 2855-61      |
| 15262834    | Rutter MK, et al.             | C-reactive protein, the metabolic syndrome, and prediction of cardiovascular events in the Framingham offspring study                                                                              | Circulation     | 2004        | Jul          | 110         | 4            | 380-85       |
| 15623682    | Brown DL, et al.              | Emergency department evaluation of ischemic stroke and TIA: the BASIC Project                                                                                                                      | Neurology       | 2004        | Dec          | 12          |              | 2250-54      |
| 12766359    | Nakayasu H, et al.            | The antiplatelet aggregation effects of aspirin suppositories                                                                                                                                      | Cerebrovasc Dis | 2003        |              | 16          | 1            | 31-35        |
| 12829554    | Law MR, et al.                | Quantifying effect of statins on low density lipoprotein cholesterol, ischaemic heart disease, and stroke: systematic review and meta-analysis                                                     | Br Med J        | 2003        | Jun          | 326         | 7404         | 1423         |
| 12679760    | Hague W, et al.               | Effect of pravastatin on cardiovascular events and mortality in 1516 women with coronary heart disease: results from the long-term intervention with pravastatin in ischemic disease (LIPID) study | Am Heart J      | 2003        | Apr          | 145         | 4            | 643-51       |
| 12941677    | Wang TJ, et al.               | A risk score for predicting stroke or death in individuals with new-onset atrial fibrillation in the community                                                                                     | JAMA            | 2003        | Aug          | 290         | 8            | 1049-56      |
| 12805490    | Roequer J, et al.             | Sex differences in first-ever acute stroke                                                                                                                                                         | Stroke          | 2003        | Jul          | 34          | 7            | 1581-85      |
| 12771114    | Wassertheil-Smoller S, et al. | Effect of estrogen plus progestin on stroke in postmenopausal women: the Women's Health Initiative: a randomized trial                                                                             | JAMA            | 2003        | May          | 289         | 20           | 2673-84      |
| 12690218    | Di Carlo A, et al.            | Sex differences in the clinical presentation, resource use, and 3-month outcome of acute stroke in Europe: data from a multicenter multinational hospital-based registry                           | Stroke          | 2003        | May          | 34          | 5            | 1114-1119    |
| 12855818    | Glader EL, et al.             | Sex differences in management and outcome after stroke: a Swedish national perspective                                                                                                             | Stroke          | 2003        | Aug          | 34          | 8            | 1970-75      |

SUPPLEMENTARY TABLE S2. REFERENCE ARTICLES FOR DIABETES

| PMID     | Author                   | Title                                                                                                                                                           | Journal                                 | Year | Month   | Vol. | Issue | Pages    |
|----------|--------------------------|-----------------------------------------------------------------------------------------------------------------------------------------------------------------|-----------------------------------------|------|---------|------|-------|----------|
| 22373663 | Miller TM, et al.        | Sex differences in cardiovascular disease risk and exercise in type 2 diabetes                                                                                  | J Investig Med                          | 2012 | Apr     | 60   | 4     | 664-70   |
| 22236023 | Franconi F, et al.       | Sex-gender differences in diabetes vascular complications and treatment                                                                                         | Endocr Metab Immune Disord Drug Targets | 2012 | Jun     | 12   | 2     | 179-96   |
| 22047952 | Le TN, et al.            | Sex hormone-binding globulin and type 2 diabetes mellitus                                                                                                       | Trends Endocrinol Metab                 | 2012 | Jan     | 23   | 1     | 32-40    |
| 22983665 | Vistisen D, et al.       | Sex differences in glucose and insulin trajectories prior to diabetes diagnosis: the Whitehall II study                                                         | Acta Biabetol                           | 2012 | Sep     | epub |       |          |
| 22709979 | Codner E, et al.         | Female reproduction and type 1 diabetes: from mechanisms to clinical findings                                                                                   | Hum Reprod Update                       | 2012 | Sep-Oct | 18   | 5     | 568-85   |
| 21147888 | Anderwald C, et al.      | Mechanism and effects of glucose absorption during an oral glucose tolerance test among females and males                                                       | J Clin Endocrinol Metab                 | 2011 | Feb     | 96   | 2     | 515-24   |
| 21281456 | Meyer MR, et al.         | Obesity, insulin resistance and diabetes: sex differences and role of oestrogen receptors                                                                       | Acta Physiol (Oxf)                      | 2011 | Sep     | 203  | 1     | 259-69   |
| 21161738 | Peek ME                  | Gender differences in diabetes-related lower extremity amputations                                                                                              | Clin Orthop Relat Res                   | 2011 | Jul     | 469  | 7     | 1951-5   |
| 22117097 | Branstrom J, et al.      | Gender disparities in the pharmacological treatment of cardiovascular disease and diabetes mellitus in the very old: an epidemiological, cross-sectional survey | Drugs Aging                             | 2011 | Dec     | 28   | 12    | 993-1005 |
| 22055610 | Barski L, et al.         | Gender-related differences in clinical characteristics and outcomes in patients with diabetic ketoacidosis                                                      | Gend Med                                | 2011 | Dec     | 8    | 6     | 372-7    |
| 21978180 | Hayashi T, et al.        | Age, gender, insulin and blood glucose control status alter the risk of ischemic heart disease and stroke among elderly diabetic patients.                      | Cardiovasc Diabetol                     | 2011 | Oct     | 10   |       | 86       |
| 21840097 | Costacou T, et al.       | Sex differences in the development of kidney disease in individuals with type 1 diabetes mellitus: a contemporary analysis                                      | Am J Kidney Dis                         | 2011 | Oct     | 58   | 4     | 565-73   |
| 20797801 | Chen da C, et al.        | Gender differences in the prevalence of diabetes mellitus in chronic hospitalized patients with schizophrenia on long-term antipsychotics                       | Psychiatry Res                          | 2011 | Apr     | 186  | 2-3   | 451-3    |
| 22188707 | Ogita M, et al.          | Gender-based outcomes among patients with diabetes mellitus after percutaneous coronary intervention in the drug-eluting stent era                              | Int Heart J                             | 2011 |         | 52   | 6     | 348-52   |
| 21763763 | Ceylan-Isik AF, et al.   | Insulin-like growth factor I (IGF-1) deficiency ameliorates sex difference in cardiac contractile function and intracellular Ca(2+) homeostasis                 | Toxicol Lett                            | 2011 | Oct     | 206  | 2     | 130-8    |
| 20182862 | Faerch K, et al.         | Sex differences in glucose levels: a consequence of physiology of methodological convenience? The Inter99 Study                                                 | Diabetologia                            | 2010 | May     | 53   | 5     | 858-65   |
| 21195357 | Kautzky-Willer A, et al. | Sex-specific differences in metabolic control, cardiovascular risk, and interventions in patients with type 2 diabetes mellitus                                 | Gend Med                                | 2010 | Dec     | 7    | 6     | 571-83   |
| 20210844 | Venskutonyte L, et al.   | Effect of gender on prognosis in patients with myocardial infarction and type 2 diabetes                                                                        | J Intern Med                            | 2010 | Jul     | 268  | 1     | 75-82    |

(continued)

SUPPLEMENTARY TABLE S2. (CONTINUED)

| PMID     | Author                   | Title                                                                                                                                                                    | Journal                        | Year | Month   | Vol. | Issue  | Pages     |
|----------|--------------------------|--------------------------------------------------------------------------------------------------------------------------------------------------------------------------|--------------------------------|------|---------|------|--------|-----------|
| 20578004 | Chen HF, et al.          | Risk of malignant neoplasms of liver and biliary tract in diabetic patients with different age and sex stratifications                                                   | Hepatology                     | 2010 | Jul     | 52   | 1      | 155-63    |
| 18835953 | Pradhan AD, et al.       | A randomized trial of low-dose aspirin in the prevention of clinical type 2 diabetes in women                                                                            | Diabetes Care                  | 2009 | Jan     | 32   | 1      | 3-8       |
| 19496803 | Kautzky-Willer A, et al. | Metabolic diseases and associated complications: sex and gender matter!                                                                                                  | Eur J Clin Invest              | 2009 | Aug     | 39   | 8      | 631-48    |
| 19687788 | Szmulowicz E, et al.     | Influence of menopause on diabetes and diabetes risk                                                                                                                     | Nat Rev Endocrinol             | 2009 | Oct     | 5    | 10     | 553-8     |
| 19657112 | Ding EL, et al.          | Sex hormone-binding globulin and risk of type 2 diabetes in women and men                                                                                                | N Engl J Med                   | 2009 | Sep     | 361  | 12     | 1152-63   |
| 19038283 | Cordero A, et al.        | Gender differences in obesity related cardiovascular risk factors in Spain                                                                                               | Prev Med                       | 2009 | Feb     | 48   | 2      | 134-9     |
| 18207451 | Valham F, et al.         | Snoring and witnessed sleep apnea is related to diabetes mellitus in women                                                                                               | Sleep Med                      | 2009 | Jan     | 10   | 1      | 112-7     |
| 19136652 | Macotella Y, et al.      | Sex and depot differences in adipocyte insulin sensitivity and glucose metabolism                                                                                        | Diabetes                       | 2009 | Apr     | 58   | 4      | 803-12    |
| 18829029 | Oterdoom LH, et al.      | Fasting insulin is a stronger cardiovascular risk factor in women than in men                                                                                            | Atherosclerosis                | 2009 | Apr     | 203  | 2      | 640-6     |
| 19144692 | Maric C                  | Sex, diabetes and the kidney                                                                                                                                             | Am J Physiol Renal Physiol     | 2009 | Apr     | 296  | 4      | F680-8    |
| 18494812 | Szalat A, et al.         | Gender-specific care of diabetes mellitus: particular considerations in the management of diabetic women                                                                 | Diabetes Obes Metab            | 2008 | Dec     | 10   | 12     | 1135-56   |
| 18591398 | Ford ES, et al.          | Metabolic syndrome and incident diabetes: current state of the evidence                                                                                                  | Diabetes Care                  | 2008 | Sep     | 31   | 9      | 1898-1904 |
| 18815541 | Zhao HL, et al.          | Higher islet amyloid load in men than in women with type 2 diabetes mellitus                                                                                             | Pancreas                       | 2008 | Oct     | 37   | 3      | e68-73    |
| 18768035 | Hochhauser CJ, et al.    | Age at diagnosis, gender, and metabolic control in children with type 1 diabetes                                                                                         | Pediatr Diabetes               | 2008 | Jul     | 9    | 4 pt 1 | 303-7     |
| 18573483 | Unden AL, et al.         | Gender differences in self-rated health quality of life, quality of care, and metabolic control in patients with DM                                                      | Gen Med                        | 2008 | Jun     | 5    | 2      | 162-80    |
| 17934157 | Ferrara A, et al.        | Sex disparities in control and treatment of modifiable cardiovascular disease risk factors among patients with DM: Translating Research Into Action for DM (TRIAD) Study | Diabetes Care                  | 2008 | Jan     | 31   | 1      | 69-74     |
| 18280437 | Aaberg ML, et al.        | Gender differences in the onset of diabetic neuropathy                                                                                                                   | J Diabetes Complications       | 2008 | Mar-Apr | 22   | 2      | 83-7      |
| 18542013 | Blaak E                  | Sex differences in the control of glucose homeostasis                                                                                                                    | Curr Opin Clin Nutr Metab Care | 2008 | Jul     | 11   | 4      | 500-4     |
| 18482629 | Stephen SA, et al.       | Symptoms of acute coronary syndrome in women with diabetes: an integrative review of the literature                                                                      | Heart Lung                     | 2008 | May-Jun | 37   | 3      | 179-89    |
| 17244779 | Golden SH, et al.        | Endogenous sex hormones and glucose tolerance status in postmenopausal women                                                                                             | J Clin Endocrinol Metab        | 2007 | Apr     | 92   | 4      | 1289-95   |
| 17701157 | Ding EL, et al.          | Plasma sex steroid hormones and risk of developing type 2 diabetes in women: a prospective study                                                                         | Diabetologia                   | 2007 | Oct     | 50   | 10     | 2076-84   |

(continued)

SUPPLEMENTARY TABLE S2. (CONTINUED)

| <i>PMID</i> | <i>Author</i>           | <i>Title</i>                                                                                                                                                                                           | <i>Journal</i>            | <i>Year</i> | <i>Month</i> | <i>Vol.</i> | <i>Issue</i> | <i>Pages</i> |
|-------------|-------------------------|--------------------------------------------------------------------------------------------------------------------------------------------------------------------------------------------------------|---------------------------|-------------|--------------|-------------|--------------|--------------|
| 17392552    | Kapoor D, et al.        | Clinical and biochemical assessment of hypogonadism in men with type 2 diabetes: correlations with bioavailable testosterone and visceral adiposity                                                    | Diabetes Care             | 2007        | Apr          | 30          | 4            | 911-17       |
| 17259507    | Donahue RP, et al.      | Sex differences in endothelial function markers before conversion to pre-diabetes: does the clock start ticking earlier among women? The Western New York Study                                        | Diabetes Care             | 2007        | Feb          | 30          | 2            | 354-9        |
| 17334638    | Yamaguchi S, et al.     | Gender differences in the association of gene polymorphisms with type 2 diabetes mellitus                                                                                                              | Int J Mol Med             | 2007        | Apr          | 19          | 4            | 631-7        |
| 17392546    | Thorand B, et al.       | Sex differences in the prediction of type 2 diabetes mellitus by inflammatory markers: results from the MONICA/KORA Augsburg case-cohort study, 1984-2002                                              | Diabetes Care             | 2007        | Apr          | 30          | 4            | 854-60       |
| 18062757    | McCollum M, et al.      | Inconsistent health perceptions for US women and men with diabetes                                                                                                                                     | J Womens Health (Larchmt) | 2007        | Dec          | 16          | 10           | 1421-8       |
| 17803576    | Ritchison A, et al.     | Gender differences in diabetic patients following coronary artery bypass graft surgery                                                                                                                 | J Card Surg               | 2007        | Sep-Oct      | 22          | 5            | 401-5        |
| 17576993    | Gregg EW, et al.        | Mortality trends in men and women with diabetes, 1971-2000                                                                                                                                             | Ann Intern Med            | 2007        | Aug          | 147         | 3            | 149-55       |
| 17192333    | Rana JS, et al.         | Adiposity compared with physical inactivity and risk of type 2 diabetes in women                                                                                                                       | Diabetes Care             | 2007        | Jan          | 30          | 1            | 53-8         |
| 17213751    | Otsuki M, et al.        | Menopause, but not age, is an independent risk factor for fasting plasma glucose levels in nondiabetic women                                                                                           | Menopause                 | 2007        | May-Jun      | 14          | 3 pt 1       | 404-7        |
| 17540197    | Champney KP, et al.     | Sex-specific effects of diabetes on adverse outcomes after percutaneous coronary intervention: trends over time                                                                                        | Am Heart J                | 2007        | Jun          | 153         | 6            | 970-8        |
| 17392555    | Kuch B, et al.          | Sex-specific determinants of left ventricular mass in pre-diabetic and type 2 diabetic subjects                                                                                                        | Diabetes Care             | 2007        | Apr          | 30          | 4            | 946-52       |
| 17164570    | Lin M, et al.           | Stroke associated with diabetes among Canadians: sex and age differences                                                                                                                               | Neuroepidemiology         | 2007        |              | 28          | 1            | 46-49        |
| 17284617    | Codner E, et al.        | Clinical review: Hyperandrogenism and polycystic ovary syndrome in women with type 1 diabetes mellitus                                                                                                 | J Clin Endocrinol Metab   | 2007        | Apr          | 92          | 4            | 1209-16      |
| 16960160    | Meisinger C, et al.     | Body fat distribution and risk of type 2 diabetes in the general population: are there differences between men and women? The MONICA/KORA Augsburg cohort study                                        | Am J Clin Nutr            | 2006        | Sep          | 84          | 3            | 483-9        |
| 16537739    | Ding EL, et al.         | Sex differences of endogenous sex hormones and risk of type 2 diabetes: a systematic review and meta-analysis                                                                                          | JAMA                      | 2006        | Mar          | 295         | 11           | 1288-99      |
| 17130501    | van Genugten RE, et al. | Effects of sex and hormone replacement therapy use on the prevalence of isolated impaired fasting glucose and isolated impaired glucose tolerance in subjects with a family history of T2DM            | Diabetes                  | 2006        | Dec          | 55          | 12           | 3529-3535    |
| 16443863    | Schwab KO, et al.       | Spectrum and prevalence of atherogenic risk factors in 27,358 children, adolescents, and young adults with T1DM: cross-sectional data from German DM documentation and quality management system (DPV) | Diabetes Care             | 2006        | Feb          | 29          | 2            | 218-225      |
| 16906437    | Avery CL, et al.        | Genotype-by-sex interaction in the aetiology of type 2 diabetes mellitus: support for sex-specific quantitative trait loci in Hypertension Genetic Epidemiology Network participants                   | Diabetologia              | 2006        | Oct          | 49          | 10           | 2329-36      |

(continued)

SUPPLEMENTARY TABLE S2. (CONTINUED)

| <i>PMID</i> | <i>Author</i>                | <i>Title</i>                                                                                                                                                                                                      | <i>Journal</i>          | <i>Year</i> | <i>Month</i> | <i>Vol.</i> | <i>Issue</i> | <i>Pages</i> |
|-------------|------------------------------|-------------------------------------------------------------------------------------------------------------------------------------------------------------------------------------------------------------------|-------------------------|-------------|--------------|-------------|--------------|--------------|
| 16860272    | Legato MJ, et al.            | Gender-specific care of the patient with diabetes: review and recommendations                                                                                                                                     | Gend Med                | 2006        | Jun          | 3           | 2            | 131-58       |
| 16352690    | Cavalot F, et al.            | Postprandial blood glucose is a stronger predictor of cardiovascular events than fasting blood glucose in type 2 diabetes mellitus, particularly in women: lessons from the San Luigi Gonzaga Diabetes Study      | J Clin Endocrinol Metab | 2006        | Mar          | 91          | 3            | 813-9        |
| 16890492    | Barros RP, et al.            | Estrogen receptors: new players in diabetes mellitus                                                                                                                                                              | Trends Mol Med          | 2006        | Sep          | 12          | 9            | 425-31       |
| 16598562    | Regitz-Zagrosek V, et al.    | Gender differences in the metabolic syndrome and their role for cardiovascular disease                                                                                                                            | Clin Res Cardiol        | 2006        | Mar          | 95          | 3            | 136-47       |
| 16598200    | Patterson-Fernholm K, et al. | The AT2 gene may have a gender-specific effect on kidney function and pulse pressure in type 1 diabetic patients                                                                                                  | Kidney Int              | 2006        | May          | 69          | 10           | 1880-4       |
| 16371403    | Huxley R, et al.             | Excess risk of fatal coronary heart disease associated with diabetes in men and women: meta-analysis of 37 prospective cohort studies                                                                             | BMJ                     | 2006        | Jan          | 332         | 7533         | 73-8         |
| 16804310    | Arboix A, et al.             | Impact of female gender on prognosis in type 2 diabetic patients with ischemic stroke                                                                                                                             | Eur Neuro               | 2006        |              | 56          | 1            | 6-12         |
| 17054606    | Sundquist K, et al.          | Type 1 diabetes as a risk factor for stroke in men and women aged 15-49: a nationwide study from Sweden                                                                                                           | Diabet Med              | 2006        | Nov          | 23          | 11           | 1261-67      |
| 17065676    | Chen HF, et al.              | Age and sex may significantly interact with diabetes on the risks of lower extremity amputation and peripheral revascularization procedures: evidence from a cohort of a half0million diabetic patients           | Diabetes Care           | 2006        | Nov          | 29          | 11           | 2409-14      |
| 16828130    | Zhao W, et al.               | Association between diabetes and depression: Sex and age differences                                                                                                                                              | Public Health           | 2006        | Aug          | 120         | 8            | 696-704      |
| 15769764    | Sutton-Tyrrell K, et al.     | Sex hormone-binding globulin and the free androgen index are related to cardiovascular risk factors in multiethnic premenopausal and perimenopausal women enrolled in the Study of Women Across the Nation (SWAN) | Circulation             | 2005        | Mar          | 111         | 10           | 1242-49      |
| 16146980    | Demirbag R, et al.           | The association of total antioxidant capacity with sex hormones                                                                                                                                                   | Scand Cardiovasc J      | 2005        | Jul          | 39          | 3            | 172-76       |
| 16051657    | Rathmann W, et al.           | Sex differences in the associations of socioeconomic status with undiagnosed diabetes mellitus and impaired glucose tolerance in the elderly population: the KORA survey 2000                                     | Eur J Public Health     | 2005        | Dec          | 15          | 6            | 627-633      |
| 16080591    | Svensson J, et al.           | Early childhood risk factors associated with T1DM - is gender important?                                                                                                                                          | Eur J Epidemiol         | 2005        |              | 20          | 5            | 429-34       |
| 15623819    | Apridonidze T, et al.        | Prevalence and characteristics of the metabolic syndrome in women with polycystic ovary syndrome                                                                                                                  | J Clin Endocrinol Metab | 2005        | Apr          | 90          | 4            | 1929-35      |
| 16464736    | McCollum M, et al.           | Gender differences in diabetes mellitus and effects on self-care activity                                                                                                                                         | Gend Med                | 2005        | Dec          | 2           | 4            | 246-54       |
| 15793269    | Gillespie KM, et al.         | Is puberty an accelerator of type 1 diabetes in IL6-174CC females?                                                                                                                                                | Diabetes                | 2005        | Apr          | 54          | 4            | 1245-8       |
| 16171812    | Fukagawa NK, et al.          | Acto-myosin crossbridge kinetics in humans with coronary artery disease: influence of sex and DM mellitus                                                                                                         | J Mol Cell Cardiol      | 2005        | Nov          | 39          | 5            | 743-53       |
| 15560901    | Shalev V, et al.             | Gender differences in healthcare utilization and medical indicators among patients with DM                                                                                                                        | Public Health           | 2005        | Jan          | 119         | 1            | 45-9         |
| 16332295    | Wong M, et al.               | Gender and nutrition management in type 2 diabetes                                                                                                                                                                | Can J Diet Pract Res    | 2005        | Winter       | 66          | 4            | 215-20       |

(continued)

SUPPLEMENTARY TABLE S2. (CONTINUED)

| <i>PMID</i> | <i>Author</i>            | <i>Title</i>                                                                                                                                                           | <i>Journal</i>          | <i>Year</i> | <i>Month</i> | <i>Vol.</i> | <i>Issue</i> | <i>Pages</i> |
|-------------|--------------------------|------------------------------------------------------------------------------------------------------------------------------------------------------------------------|-------------------------|-------------|--------------|-------------|--------------|--------------|
| 16164648    | Cherney DZ, et al.       | Gender differences in renal responses to hyperglycemia and angiotensin-converting enzyme inhibition in diabetes                                                        | Kidney Int              | 2005        | Oct          | 68          | 4            | 1722-28      |
| 15738373    | Natarajan S, et al.      | Sex differences in the effect of diabetes duration on coronary heart disease mortality                                                                                 | Arch Intern Med         | 2005        | Feb          | 165         | 4            | 430-35       |
| 15735180    | Wexler DJ, et al.        | Sex disparities in treatment of cardiac risk factors in patients with type 2 diabetes                                                                                  | Diabetes Care           | 2005        | Mar          | 28          | 3            | 514-20       |
| 15353414    | Golden SH, et al.        | Glucose and insulin components of the metabolic syndrome are associated with hyperandrogenism in postmenopausal women: the atherosclerosis risk in communities study   | Am J Epidemiol          | 2004        | Sep          | 160         | 6            | 540-48       |
| 14702453    | Murphy MJ, et al.        | Girls at five are intrinsically more insulin resistant than boys: the programming hypotheses revisited - the EarlyBird study (EarlyBird 6)                             | Pediatrics              | 2004        | Jan          | 113         | 1 pt 1       | 82-6         |
| 15037992    | Lindholm E, et al.       | Gender differences in GAD antibody-positive diabetes mellitus in relation to age at onset. C-peptide and other endocrine autoimmune diseases                           | Diabetes Metab Res Rev  | 2004        | Mar-Apr      | 20          | 2            | 158-164      |
| 15562204    | Juutilainen A, et al.    | Gender difference in the impact of type 2 diabetes on coronary heart disease risk                                                                                      | Diabetes Care           | 2004        | Dec          | 27          | 12           | 2898-2904    |
| 15589486    | Ndrepepa G, et al.       | Sex-associated differences in clinical outcomes after coronary stenting in patients with diabetes mellitus                                                             | Am J Med                | 2004        | Dec          | 117         | 1            | 830-6        |
| 15136300    | Barrett-Connor E, et al. | Women and heart disease: the role of diabetes and hyperglycemia                                                                                                        | Arch Intern Med         | 2004        | May          | 164         | 9            | 934-42       |
| 12885690    | Natarajan S, et al.      | Sex differences in risk for coronary heart disease mortality associated with diabetes and established coronary heart disease                                           | Arch Intern Med         | 2003        | Jul          | 163         | 14           | 1735-40      |
| 12679451    | Kalish GM, et al.        | Association of endogenous sex hormones and insulin resistance among postmenopausal women: results from the Postmenopausal Estrogen/Progestin Intervention Trial        | J Clin Endocrinol Metab | 2003        | Apr          | 88          | 4            | 1646-52      |
| 12679432    | Randolph Jr JF, et al.   | Reproductive hormones in the early menopausal transition: relationship to ethnicity, body size, and menopausal status                                                  | J Clin Endocrinol Metab | 2003        | Apr          | 88          | 4            | 1516-22      |
| 12970085    | Naftalin RJ, et al.      | Interaction of androgens, green tea catechins and the antiandrogen flutamide with the external glucose-binding site of the human erythrocyte glucose transporter GLUT1 | Br J Pharmacol          | 2003        | Oct          | 140         | 3            | 487-99       |
| 12620438    | Li C, et al.             | Low-dose hormone therapy and carbohydrate metabolism                                                                                                                   | Fertil Steril           | 2003        | Mar          | 79          | 3            | 550-55       |
| 12513038    | Kanaya AM, et al.        | Glycemic effects of postmenopausal hormone therapy: the Heart and Estrogen/Progestin Replacement Study. A randomized, double-blind, placebo-controlled trial           | Ann Intern Med          | 2003        | Jan          | 138         | 1            | 1-9          |
| 12502659    | DECODE Study Group       | Age- and sex-specific prevalences of diabetes and impaired glucose regulation in 13 European cohorts                                                                   | Diabetes Care           | 2003        | Jan          | 26          | 1            | 61-69        |
| 12766108    | Qiao Q, et al.           | Age- and sex-specific prevalences of diabetes and impaired glucose regulation in 11 Asian cohorts                                                                      | Diabetes Care           | 2003        | Jun          | 26          | 6            | 1770-80      |
| 12551870    | Rutter MK, et al.        | Impact of glucose intolerance and insulin resistance on cardiac structure and function: sex-related differences in the Framingham Heart Study                          | Circulation             | 2003        | Jan          | 107         | 3            | 448-54       |
